# Supplementary material
Source: PubMed Central journal article supplement (PMC9206254)
Supplement: 12909_2022_3530_MOESM1_ESM.pdf [file 12909_2022_3530_MOESM1_ESM.pdf]

# 2020 Baseline Assessment, MSSRP

Please complete the survey below. NOTE: Allow yourself at least 15 minutes to complete this survey. In the following questions, the terms: substance use includes drugs and alcohol, not tobacco products. Drugs does not include alcohol or tobacco products.

## Your Background

1) Have you ever worked or volunteered in a substance use treatment setting for a month or more?

- Yes  
 No

2) Have you ever visited the following in a professional context?

- Yes, a 12-step program (AA or NA)  
 Yes, a substance use treatment facility only (e.g. detox, methadone-maintenance)  
 Yes, both a 12-step program and a substance use treatment facility  
 No, I have not visited either a 12-step program or a substance use treatment facility

3) Over the past year, how many hours have you participated in each of the following when substance use was the topic? (Please use numbers, e.g. "2" rather than "two." Also, indicate "0" if you have not participated in the activity.)

...conferences (e.g., journal club, grand rounds, morning report, attending rounds, M&M conferences) \_\_\_\_\_

...educational programs at your institution (e.g., courses, online courses, seminars, lectures) \_\_\_\_\_

...educational programs external to your institution (e.g., courses, seminars, lectures, conferences) \_\_\_\_\_

Your Background in Addiction Medicine and Research

- Addiction  
 Drug and Alcohol Dependence  
 Journal of Studies on Alcohol and Drugs  
 Other

Which of the following journals have you read in the past year? Check all that apply.

If other, please describe \_\_\_\_\_

## Your Education Experience

Which substance use (SU) topics were covered in your educational experience? Check all that apply no matter what the venue.

- Did not learn about substance use in the past 6 months  
 Neurobiology of substance use  
 Epidemiology of substance use  
 Screening and assessment  
 Stages of behavioral change  
 Brief intervention counseling strategies  
 Evidence-based SU treatment approaches  
 Interplay between pain and addiction  
 Comorbidities with SU (e.g., hepatitis and SU)  
 Other substance use topics

Please specify "other" in the box below.

\_\_\_\_\_

|                                                                                     |                       |                       |                       |                       |                       |
|-------------------------------------------------------------------------------------|-----------------------|-----------------------|-----------------------|-----------------------|-----------------------|
| How much do you enjoy learning about substance use?                                 | <input type="radio"/> | <input type="radio"/> | <input type="radio"/> | <input type="radio"/> | <input type="radio"/> |
|                                                                                     | Not at all confident  |                       |                       | Very confident        |                       |
| Overall, how confident are you about your knowledge of substance use?               | <input type="radio"/> | <input type="radio"/> | <input type="radio"/> | <input type="radio"/> | <input type="radio"/> |
|                                                                                     | Not included at all   |                       |                       | Included a great deal |                       |
| Overall, to what extent is training about substance use included in your education? | <input type="radio"/> | <input type="radio"/> | <input type="radio"/> | <input type="radio"/> | <input type="radio"/> |

**Your Future Plans**

|                                                                                            |                       |                       |                       |                       |                       |
|--------------------------------------------------------------------------------------------|-----------------------|-----------------------|-----------------------|-----------------------|-----------------------|
|                                                                                            | Not at all interested |                       |                       | Very interested       |                       |
| How interested are you in conducting substance use-related research in your future career? | <input type="radio"/> | <input type="radio"/> | <input type="radio"/> | <input type="radio"/> | <input type="radio"/> |

After completing medical school/other educational training, how likely are you to specialize in substance use, clinical or research?  Not at all  Somewhat  Very much

**What experience have you had, if any, in the following tasks?**

**a) Had this experience**

|                                                                                      | Yes                   | No                    |
|--------------------------------------------------------------------------------------|-----------------------|-----------------------|
| Grant preparation and submission                                                     | <input type="radio"/> | <input type="radio"/> |
| Submission of a proposal to an IRB                                                   | <input type="radio"/> | <input type="radio"/> |
| Research design                                                                      | <input type="radio"/> | <input type="radio"/> |
| Data collection                                                                      | <input type="radio"/> | <input type="radio"/> |
| Data analysis                                                                        | <input type="radio"/> | <input type="radio"/> |
| Writing up results (e.g., manuscript presentation, poster, or oral presentation)     | <input type="radio"/> | <input type="radio"/> |
| Working with someone you consider to be a research mentor on any or all of the above | <input type="radio"/> | <input type="radio"/> |

**b) Addressed issues related to substance use?**

|                                                                                      | Yes                   | No                    |
|--------------------------------------------------------------------------------------|-----------------------|-----------------------|
| Grant preparation and submission                                                     | <input type="radio"/> | <input type="radio"/> |
| Submission of a proposal to an IRB                                                   | <input type="radio"/> | <input type="radio"/> |
| Research design                                                                      | <input type="radio"/> | <input type="radio"/> |
| Data collection                                                                      | <input type="radio"/> | <input type="radio"/> |
| Data analysis                                                                        | <input type="radio"/> | <input type="radio"/> |
| Writing up results (e.g., manuscript presentation, poster, or oral presentation)     | <input type="radio"/> | <input type="radio"/> |
| Working with someone you consider to be a research mentor on any or all of the above | <input type="radio"/> | <input type="radio"/> |

**How confident are you in performing the following?**

|                                                                                                               | Not at all confident  | 2                     | 3                     | 4                     | Very confident        |
|---------------------------------------------------------------------------------------------------------------|-----------------------|-----------------------|-----------------------|-----------------------|-----------------------|
| Working with a mentor                                                                                         | <input type="radio"/> | <input type="radio"/> | <input type="radio"/> | <input type="radio"/> | <input type="radio"/> |
| Developing a research question based on available or new data                                                 | <input type="radio"/> | <input type="radio"/> | <input type="radio"/> | <input type="radio"/> | <input type="radio"/> |
| Describing different study designs and their pros and cons for answering different kinds of questions         | <input type="radio"/> | <input type="radio"/> | <input type="radio"/> | <input type="radio"/> | <input type="radio"/> |
| Preparing an IRB proposal for a research project                                                              | <input type="radio"/> | <input type="radio"/> | <input type="radio"/> | <input type="radio"/> | <input type="radio"/> |
| Conducting research studies with ethical conduct and human participation protections in mind                  | <input type="radio"/> | <input type="radio"/> | <input type="radio"/> | <input type="radio"/> | <input type="radio"/> |
| Conducting a literature search or review relevant to your research project                                    | <input type="radio"/> | <input type="radio"/> | <input type="radio"/> | <input type="radio"/> | <input type="radio"/> |
| Collecting data, whether that be from appropriate databases, research participants, or other relevant sources | <input type="radio"/> | <input type="radio"/> | <input type="radio"/> | <input type="radio"/> | <input type="radio"/> |
| Entering and managing data, including quality control                                                         | <input type="radio"/> | <input type="radio"/> | <input type="radio"/> | <input type="radio"/> | <input type="radio"/> |
| Analyzing data, including using statistical software or analytic procedures                                   | <input type="radio"/> | <input type="radio"/> | <input type="radio"/> | <input type="radio"/> | <input type="radio"/> |

- |                                                                                                       |                       |                       |                       |                       |                       |
|-------------------------------------------------------------------------------------------------------|-----------------------|-----------------------|-----------------------|-----------------------|-----------------------|
| Working on a research team<br>(e.g., with research assistants,<br>statistician, project manager)      | <input type="radio"/> | <input type="radio"/> | <input type="radio"/> | <input type="radio"/> | <input type="radio"/> |
| Interpreting and writing up a<br>discussion of your results,<br>whether as a poster or<br>publication | <input type="radio"/> | <input type="radio"/> | <input type="radio"/> | <input type="radio"/> | <input type="radio"/> |
| Submitting research for<br>publication in journals                                                    | <input type="radio"/> | <input type="radio"/> | <input type="radio"/> | <input type="radio"/> | <input type="radio"/> |
| Submitting research for<br>presentation at scientific<br>conferences                                  | <input type="radio"/> | <input type="radio"/> | <input type="radio"/> | <input type="radio"/> | <input type="radio"/> |

### Demographic Information

34) Have you or are you currently attending a non-U.S. (or foreign) educational institution?

- Yes  
 No

Gender:

- Female  
 Male  
 Prefer to self describe

If you selected "prefer to self describe," please specify:

\_\_\_\_\_

Ethnicity:

- Hispanic or Latino  
 Not Hispanic or Latino

Race:

Check all that apply.

- American Indian/Alaskan Native  
 Asian  
 Native Hawaiian/Other Pacific Islander  
 Black/African American  
 White  
 Other (specify other in box below)

Please specify "other" in the box below.

\_\_\_\_\_

Sexuality:

- Heterosexual  
 Bisexual  
 Homosexual  
 Other  
 Prefer not to disclose

---

Please specify "other" in the box below.

\_\_\_\_\_

---

Do you have a disability?

- Yes
- No
- Prefer not to disclose

---

Please indicate your current status as a student:

- Medical student
- Undergraduate student
- Graduate student
- Other

---

Please specify "other" in the box below:

\_\_\_\_\_

---

Please list your current institution in the box below:

\_\_\_\_\_

---

Please provide feedback about the survey or any additional comments.

# Evaluation for Addiction Medicine Observations & CARE Summer Project

Please complete the survey below.

Thank you!

- 1) I am a:
- Medical Student
  - Undergraduate Student
  - Other

**For each observation you attended, on a scale of 1-5 (with 5 being very accommodating), how accommodating was the mentor (host) to your observation experience?**

|                                          | 1 (Not at all)        | 2                     | 3                     | 4                     | 5 (Very)              | N/A (Did not observe) |
|------------------------------------------|-----------------------|-----------------------|-----------------------|-----------------------|-----------------------|-----------------------|
| 2) Faculty Mentor or Designated Provider | <input type="radio"/> | <input type="radio"/> | <input type="radio"/> | <input type="radio"/> | <input type="radio"/> | <input type="radio"/> |
| 3) Addiction Consult Service             | <input type="radio"/> | <input type="radio"/> | <input type="radio"/> | <input type="radio"/> | <input type="radio"/> | <input type="radio"/> |
| 4) Rounds<br>ECHO                        | <input type="radio"/> | <input type="radio"/> | <input type="radio"/> | <input type="radio"/> | <input type="radio"/> | <input type="radio"/> |
| 5) CATALYST Team Meeting                 | <input type="radio"/> | <input type="radio"/> | <input type="radio"/> | <input type="radio"/> | <input type="radio"/> | <input type="radio"/> |
| 6) SCOPE of Pain Training(s)             | <input type="radio"/> | <input type="radio"/> | <input type="radio"/> | <input type="radio"/> | <input type="radio"/> | <input type="radio"/> |
| 7) OBAT Training (s)                     | <input type="radio"/> | <input type="radio"/> | <input type="radio"/> | <input type="radio"/> | <input type="radio"/> | <input type="radio"/> |

|                                                                              | 1 (Least useful)      | 2                     | 3                     | 4                     | 5 (Most useful)       | N/A (did not observe) |
|------------------------------------------------------------------------------|-----------------------|-----------------------|-----------------------|-----------------------|-----------------------|-----------------------|
| 8) Overall, how useful was the addiction medicine observation series to you? | <input type="radio"/> | <input type="radio"/> | <input type="radio"/> | <input type="radio"/> | <input type="radio"/> | <input type="radio"/> |

|                                                                    | 1 (Not at all useful) | 2                     | 3                     | 4                     | 5 (Very useful)       | N/A (Did not observe) |
|--------------------------------------------------------------------|-----------------------|-----------------------|-----------------------|-----------------------|-----------------------|-----------------------|
| 9) How clear were directions and scheduling for your observations? | <input type="radio"/> | <input type="radio"/> | <input type="radio"/> | <input type="radio"/> | <input type="radio"/> | <input type="radio"/> |

10) Do you have any suggestions or comments for directions and scheduling?  
\_\_\_\_\_

11) Do you have any comments or suggestions for the mentors (hosts)?  
\_\_\_\_\_

12) Do you have any other general suggestions for addiction medicine observations?  
\_\_\_\_\_

13) What were your learning goals this summer?  
\_\_\_\_\_

14) Were these goals met or unmet, and in what way?  
\_\_\_\_\_

15) What was the MOST useful or valuable experience during your summer project?

\_\_\_\_\_

16) What was the LEAST useful or valuable experience during your summer project?

\_\_\_\_\_

### How confident are you in performing the following?

|                                                                                                                                                  | Not at all confident  | 2                     | 3                     | 4                     | Very confident        |
|--------------------------------------------------------------------------------------------------------------------------------------------------|-----------------------|-----------------------|-----------------------|-----------------------|-----------------------|
| 17) Working with a mentor                                                                                                                        | <input type="radio"/> | <input type="radio"/> | <input type="radio"/> | <input type="radio"/> | <input type="radio"/> |
| 18) Developing a research question based on available or new data                                                                                | <input type="radio"/> | <input type="radio"/> | <input type="radio"/> | <input type="radio"/> | <input type="radio"/> |
| 19) Describing different study designs and their pros and cons for answering different kinds of questions                                        | <input type="radio"/> | <input type="radio"/> | <input type="radio"/> | <input type="radio"/> | <input type="radio"/> |
| 20) Preparing an IRB proposal for a research project                                                                                             | <input type="radio"/> | <input type="radio"/> | <input type="radio"/> | <input type="radio"/> | <input type="radio"/> |
| 21) Conducting research studies with ethical conduct and human participation protections in mind                                                 | <input type="radio"/> | <input type="radio"/> | <input type="radio"/> | <input type="radio"/> | <input type="radio"/> |
| 22) Conducting a literature search or review relevant to your research project                                                                   | <input type="radio"/> | <input type="radio"/> | <input type="radio"/> | <input type="radio"/> | <input type="radio"/> |
| 23) Collecting data, whether that be from appropriate databases, research participants, or other relevant sources                                | <input type="radio"/> | <input type="radio"/> | <input type="radio"/> | <input type="radio"/> | <input type="radio"/> |
| 24) Entering and managing data, including quality control                                                                                        | <input type="radio"/> | <input type="radio"/> | <input type="radio"/> | <input type="radio"/> | <input type="radio"/> |
| 25) Analyzing data, including using statistical software or analytic procedures                                                                  | <input type="radio"/> | <input type="radio"/> | <input type="radio"/> | <input type="radio"/> | <input type="radio"/> |
| 26) Working on a research team (e.g., with research assistants, statistician, project manager)                                                   | <input type="radio"/> | <input type="radio"/> | <input type="radio"/> | <input type="radio"/> | <input type="radio"/> |
| 27) Interpreting and writing up a discussion of your results, whether as a poster or publication Submitting research for publication in journals | <input type="radio"/> | <input type="radio"/> | <input type="radio"/> | <input type="radio"/> | <input type="radio"/> |

28)

Submitting research for  
presentation at scientific  
conferences

---

29) Overall, how confident are you about your knowledge of  
substance use?

\_\_\_\_\_

---

30) How much do you enjoy learning about substance use?

\_\_\_\_\_

---

31) How interested are you in conducting substance  
use-related research in your future career?

Not at all interested  2  
 3  4  Very interested

---

32) After completing medical school/other educational  
training, how likely are you to specialize in  
substance use, clinical or research?

Not at all  2  Somewhat  
 4  Very much

---

33) What was your overall experience with the  
remote/virtual format? What worked and did not work?

\_\_\_\_\_

---

34) Do you have any suggestions for improvement?

\_\_\_\_\_



# 2020 Patient Panel

Please complete the survey below.

Thank you!

---

1) What were the most useful information or insights you learned at this panel?

---

---

2) What could be improved or removed from the panel?

---

---

3) How useful is hearing patient perspectives to you?

- Not at all
- 
- Somewhat
- 
- Very much

---

4) Would you recommend this panel for next year? Why or why not?

---

---

5) Other comments or suggestions for improving the panel series:

---

# 2020 Provider Panel

Please complete the survey below.

Thank you!

---

1) What were the most useful information or insights you learned at the panel?

---

---

2) What could be improved or removed from the panel?

---

---

3) Do you feel the readings assigned beforehand prepared you for this session?

- Yes
- No
- I did not read the articles beforehand
- N/A - there were no articles assigned beforehand

---

4) Please explain further:

---

---

5) Would you recommend this panel for next year? Why or why not?

---

---

6) Other comments or suggestions for improving the panel series:

---
